# Supplementary material
Source: PubMed Central journal article supplement (PMC2644141)
Supplement: 0808866106_0808866106SI.pdf [file 0808866106_0808866106SI.pdf]

# Supporting Information

Semerad et al. 10.1073/pnas.0808866106

## SI Materials and Methods

**Mice.** E2A  $-/-$  and E2A<sup>GFP</sup> mice were described previously (1, 2). Unless otherwise stated in the text, we used 8- to 12-week-old mice in all studies. Mice were housed in a specific pathogen-free environment at the University of California, San Diego. Animal care and experimental procedures were approved by the Animal Subjects Committee, University of California, San Diego.

**Peripheral Blood and Bone Marrow Analysis.** Blood was obtained by retro-orbital venous plexus sampling in polypropylene tubes containing EDTA. Bone marrow was harvested by flushing both femurs and tibias with  $\alpha$ -MEM containing 10% FBS or by crushing and passing through a 70- $\mu$ m filter.

**Flow Cytometry.** Hematopoietic stem cell (HSC) and hematopoietic progenitors were analyzed and sorted with a FACSaria instrument (Becton Dickinson). All antibodies were purchased from eBioscience, unless otherwise indicated. For HSC analysis and sorting, adult bone marrow cells were stained with fluorescein isothiocyanate (FITC)-CD34 (RAM34) (PharMingen), phycoerythrin (PE)-Flt-3 (A2F10), allophycocyanin (APC)- or AlexaFluor 750 (AF750)-c-kit (2B8), phycoerythrin-Cy5.5 (PE-Cy5.5)-Sca-1 (D7), and APC- or Biotin-conjugated lineage antibodies including: CD3 (145-2C11), CD4 (RM4-5), CD8 (53-6.7), B220 (RA3-6B2), CD19 (MB19-1), Gr-1 (RB6-8C5), Mac-1 (M1/70), NK1.1 (PK136), and Ter-119, followed by avidin-APC-Cy7 when applicable. LSK cells were sorted as Lin<sup>-</sup>/c-kit<sup>+</sup>/Sca-1<sup>+</sup>. Alternatively, cells were stained with FITC-CD34, PE-Flt3, PE-Cy5-IL7R $\alpha$ , PECy5.5-CD19 and -CD11c, PECy7-B220 and -NK1.1, APC-Fc $\gamma$ R, AF680-Sca-1 (I.L.W. Laboratory, Stanford University School of Medicine), AF750-c-kit, Pacific Blue (PacBlue)-Mac-1 (I.L.W. Laboratory), -Ter119 (I.L.W. Laboratory), -CD4 (I.L.W. Laboratory), and -CD8 (I.L.W. Laboratory), Pacific Orange (PacO)-Gr-1 (I.L.W. Laboratory), and biotin-CD150 followed by streptavidin-Qdot-605 (Invitrogen). CLPs were analyzed by using PE-IL-7R $\alpha$ , APC- or AF750-c-kit, PE-Cy5.5-Sca-1, and APC- or Biotin-conjugated lineage antibodies followed by avidin-APC-Cy7 when applicable. CLPs were identified as Lin<sup>-</sup>/IL-7R $\alpha$ <sup>+</sup>/c-kit<sup>int</sup>/Sca-1<sup>int</sup>. Myeloid progenitors were analyzed using APC-

conjugated lineage antibodies, AF750-c-kit, PE-Cy5.5-Sca-1, phycoerythrin-Cy7 (PE-Cy7)-CD16/32 (93), and Biotin-CD34 followed by avidin-PE. The erythromyeloid subpopulations were identified as Lin<sup>-</sup>/Sca-1<sup>-</sup>/IL-7R $\alpha$ <sup>-</sup>/c-kit<sup>+</sup>/CD34<sup>+</sup>/Fc $\gamma$ R<sup>low</sup> for CMPs, as Lin<sup>-</sup>/Sca-1<sup>-</sup>/IL-7R $\alpha$ <sup>-</sup>/c-kit<sup>+</sup>/CD34<sup>+</sup>/Fc $\gamma$ R<sup>high</sup> for GMPs, and as Lin<sup>-</sup>/Sca-1<sup>-</sup>/IL-7R $\alpha$ <sup>-</sup>/c-kit<sup>+</sup>/CD34<sup>-</sup>/Fc $\gamma$ R<sup>low</sup> for MEPs. Alternatively, to further subdivide the Lin<sup>-</sup>/c-kit<sup>+</sup>/Sca-1<sup>-</sup> compartment, cells were stained with FITC-CD34, PE-CD41, PECy5-IL7R $\alpha$ , -Mac-1, -B220, -CD4, and -CD8, PECy5.5-CD19 and -CD11c, PECy7-Ter119, APC-Fc $\gamma$ R, AF680 Sca-1, AF750 c-kit, PacBlue-CD105, PacO-Gr-1, and biotin-CD150 with streptavidin Qdot-605. Data were analyzed with FlowJo software (Treestar).

**Bone Marrow Homing Assay.** Bone marrow was harvested from 8–10 week old wild type (CD45.2<sup>+</sup>) and E2A  $-/-$  (CD45.2<sup>+</sup>) mice as described ( $n = 6$  mice for each genotype). The cells were pooled and subjected to ammonium chloride mediated RBC lysis. The samples were depleted of Lin<sup>+</sup> cells by staining with biotin-conjugated lineage antibodies (CD3, CD4, CD8, B220, CD19, Gr-1, Mac-1, NK1.1, and Ter-119), incubation with anti-biotin microbeads (Miltenyi Biotech), and isolation of Lin<sup>-</sup> cells by using AutoMACS (Miltenyi Biotech). A portion of the Lin<sup>-</sup> fraction was analyzed by flow cytometry to determine the input percentages of the LSK, LSKFlk2<sup>-</sup>, and LSKFlk2<sup>+</sup> cell subsets in the wild-type and E2A  $-/-$  samples. The Lin<sup>-</sup> cells were resuspended and 500,000 cells injected intravenously into lethally  $\gamma$ -irradiated (single dose of 1,000 cGy 24 h before transplantation) CD45.1 congenic C57/B6 mice at 10 weeks of age ( $n = 5$  recipients per genotype); 18 h posttransplantation, bone marrow was harvested from the recipient mice as described above and analyzed by flow cytometry for the presence of CD45.2<sup>+</sup>LSK, CD45.2<sup>+</sup>LSKFlk2<sup>-</sup>, and CD45.2<sup>+</sup>LSKFlk2<sup>+</sup> populations.

**CFU-G Colony Assay.** A total of  $5 \times 10^4$  bone marrow mononuclear cells were plated in 2.5 mL of methylcellulose media (MethoCult 3231; Stem Cell Technologies), supplemented with G-CSF at 100 ng/mL (Peprotech) for CFU-G cultures. Standard morphologic criteria were used to score colonies containing at least 50 cells on day 7 for CFU-G.

1. Bain G, et al. (1997) Both E12 and E47 allow commitment to the B cell lineage. *Immunity* 6:145–154.

2. Zhuang Y, Jackson A, Pan L, Shen K, Dai M (2004) Regulation of E2A gene expression in B-lymphocyte development. *Mol Immunol* 40:1165–1177.

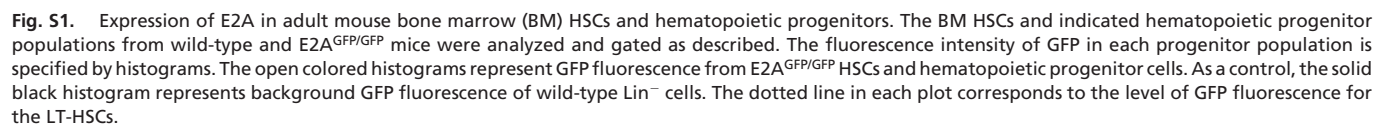

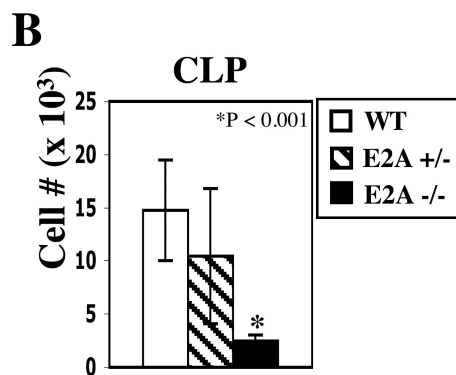

**Fig. S2.** Effect of E2A deletion on the number of common lymphoid progenitors in adult mouse BM. Total BM cells from wild-type, E2A  $+/-$ , and E2A  $-/-$  mice were harvested and prepared for analysis by flow cytometry as described. (A) Shown are representative staining profiles for CLPs. (B) Reduced number of CLPs in the BM of E2A  $-/-$  mice. Shown are the absolute numbers of CLPs in the BM of wild-type, E2A  $+/-$ , and E2A  $-/-$  mice ( $n = 8$ ). Data represent the mean  $\pm$  SD. Statistical significance determined by 2-sided Student's  $t$  test, compared with wild-type.

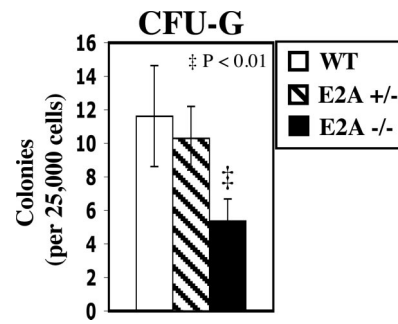

**Fig. S3.** Reduced number of CFU-G colonies in the BM of E2A  $-/-$  mice. Total BM cells from wild-type, E2A  $+/-$ , and E2A  $-/-$  mice ( $n = 4$ ) were plated in methylcellulose-containing media supplemented with G-CSF. Shown is the number of colonies per 25,000 total BM cells. Standard morphologic criteria were used to score colonies containing  $>50$  cells. Statistical significance determined by 2-sided Student's  $t$  test, compared with wild-type.

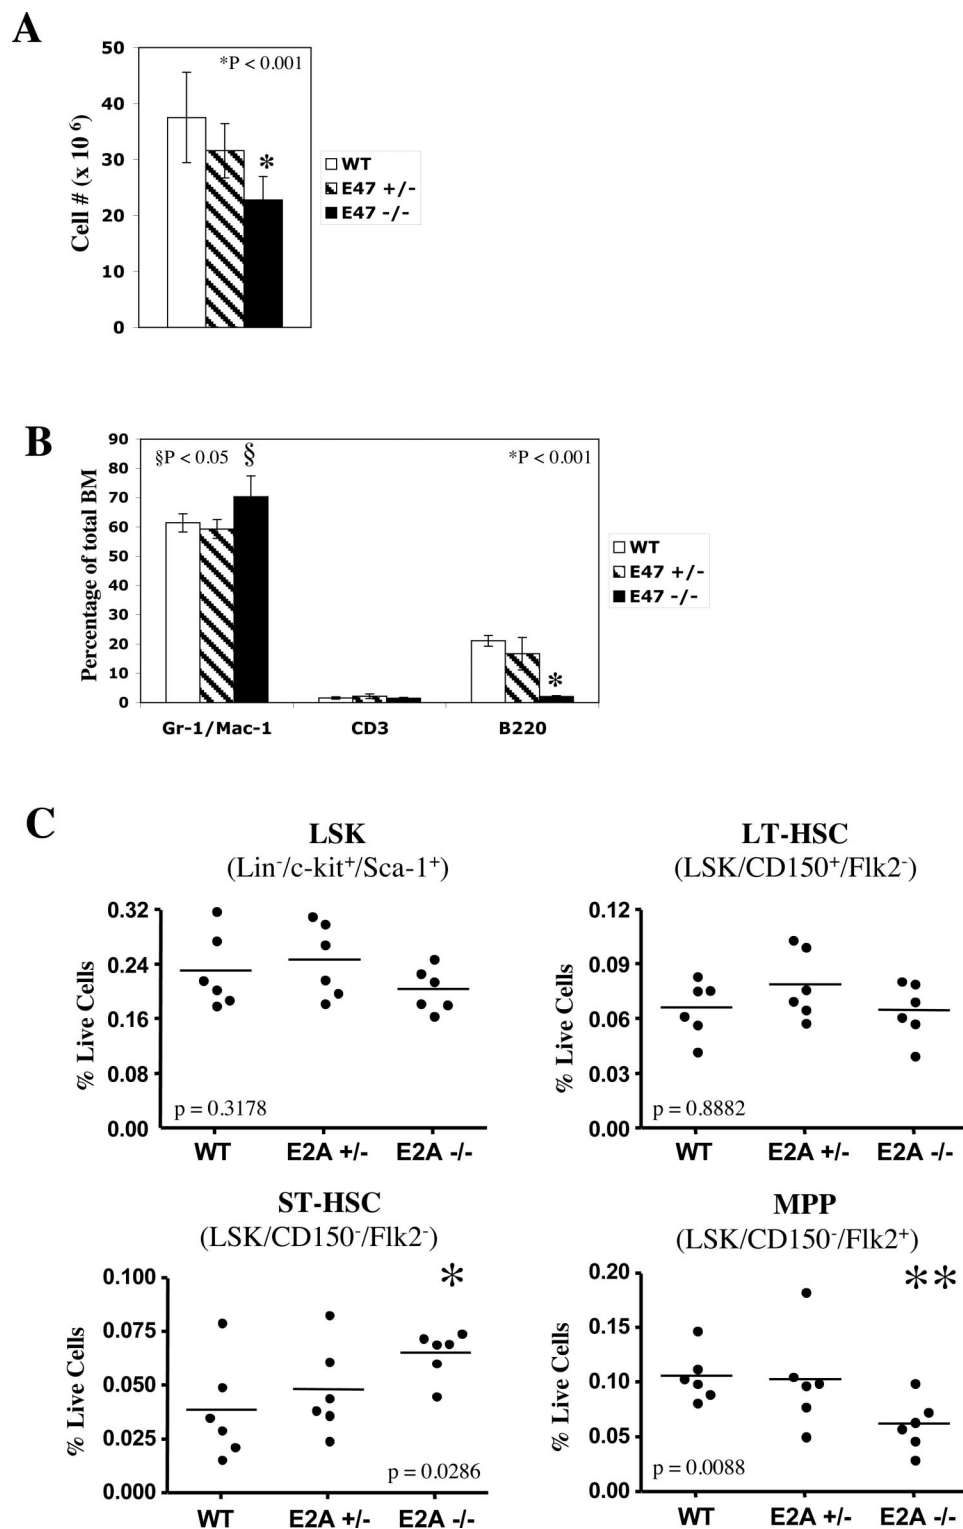

**Fig. S4.** Effects of E2A deletion on bone marrow mononuclear cell number and the frequency of HSCs in adult mouse BM. (A) Decreased BM cellularity in E2A  $-/-$  mice. Shown are the absolute numbers of bone marrow mononuclear cells from the hind limbs of 8–9 week old wild-type, E2A  $+/-$ , and E2A  $-/-$  mice ( $n = 8$ ). (B) Altered distribution of lineage positive cell subsets in the BM of E2A  $-/-$  mice. Shown are the percentages of Gr-1<sup>+</sup>/Mac-1<sup>+</sup>, CD3<sup>+</sup>, and B220<sup>+</sup> cell subsets in the bone marrow of wild-type, E2A  $+/-$ , and E2A  $-/-$  mice as determined by flow cytometry ( $n = 8$ ). (C) Frequencies of the LSK (Lin<sup>-</sup>/c-kit<sup>+</sup>/Sca-1<sup>+</sup>), LT-HSC (LSK/CD150<sup>+</sup>/Flk2<sup>-</sup>), ST-HSC (LSK/CD150<sup>-</sup>/Flk2<sup>-</sup>), and MPP (LSK/CD150<sup>+</sup>/Flk2<sup>+</sup>) cell subsets in the BM of wild-type, E2A  $+/-$ , and E2A  $-/-$  mice ( $n = 6$ ). Statistical significance determined by unpaired *t* test, 2-tailed, between E2A  $-/-$  and wild-type.

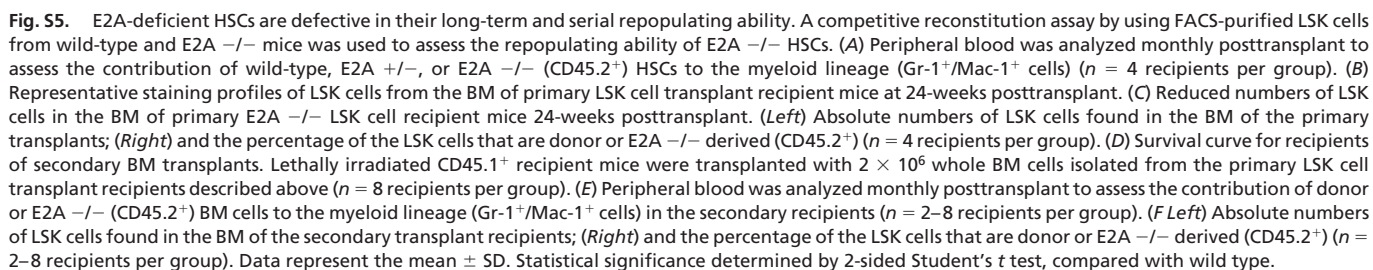

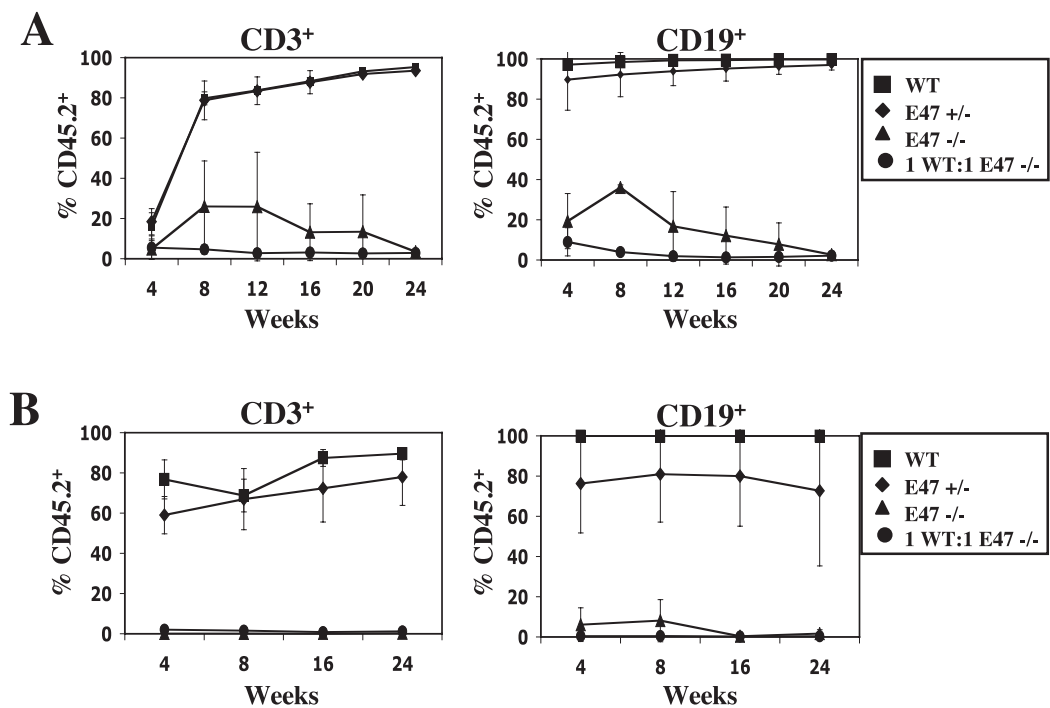

**Fig. S6.** Defective repopulation of the T- and B-lymphoid lineages by E2A-deficient HSCs. A competitive reconstitution assay by using FACS-purified LSK cells from wild-type and E2A  $-/-$  mice was used to assess the repopulating ability of E2A  $-/-$  HSCs. Peripheral blood was analyzed monthly posttransplant to assess the contribution of wild-type, E2A  $+/-$ , or E2A  $-/-$  (CD45.2<sup>+</sup>) HSCs to the T- and B-lymphoid lineages primary LSK cell transplants ( $n = 4$  recipients per group) (A); and secondary BM transplants ( $n = 2-8$  recipients per group) (B).

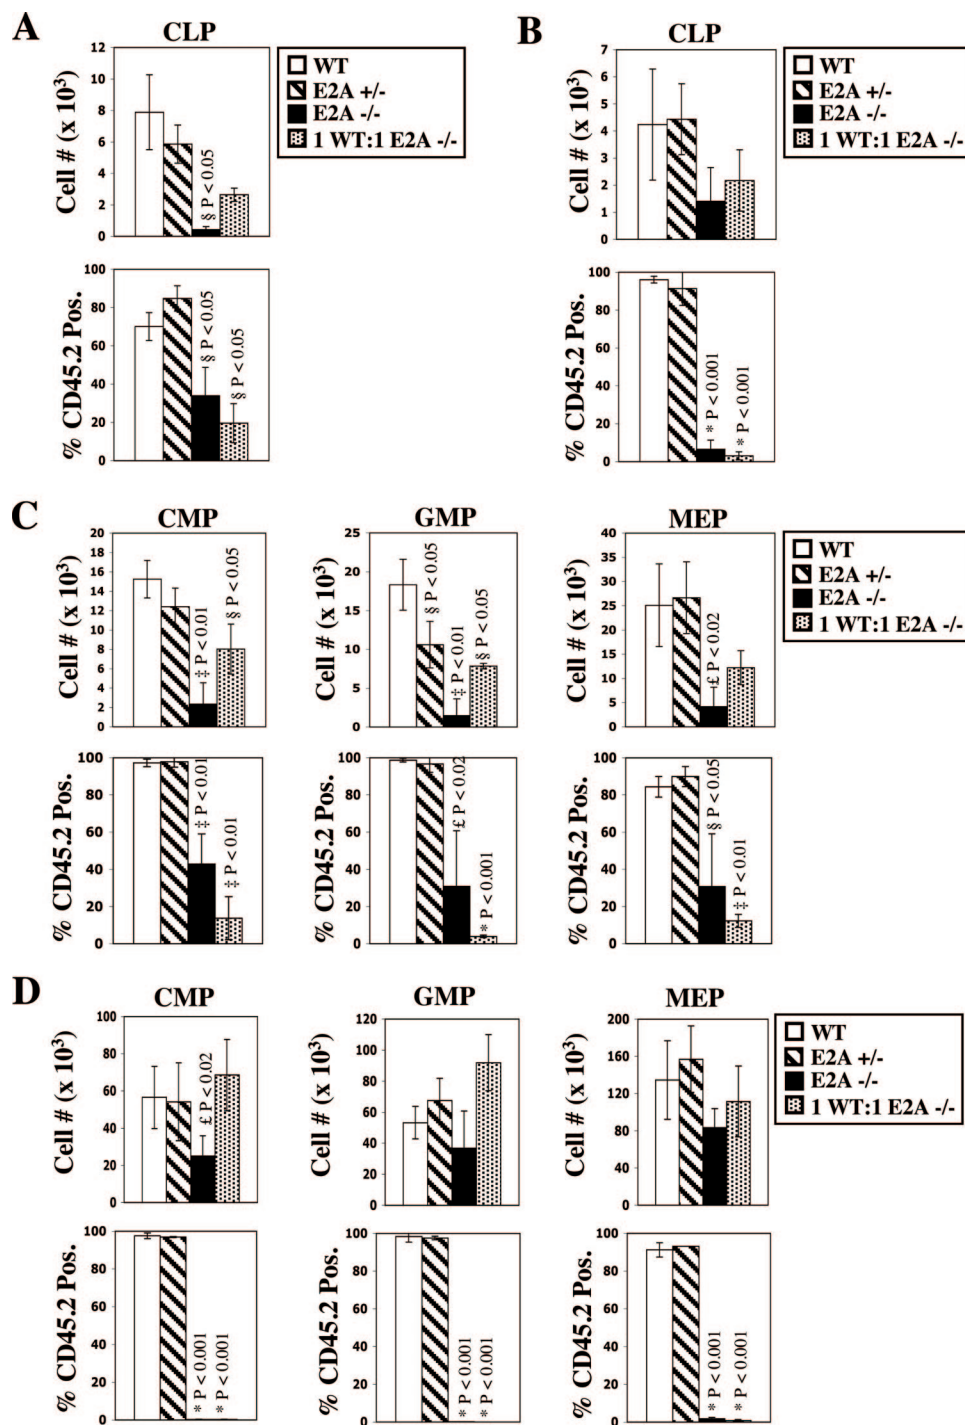

**Fig. S7.** Defective repopulation of hematopoietic progenitors by E2A-deficient HSCs. BM from primary transplant recipients receiving FACS-purified LSK cells and secondary transplant recipients receiving whole BM isolated from the primary LSK cell transplants was analyzed 24-weeks posttransplant for the presence of wild-type or E2A  $-/-$  derived lymphoid and erythromyeloid hematopoietic progenitors. (A and B) Absolute numbers (Upper) of CLPs and the percentage (Lower) of CLPs that are donor or E2A  $-/-$  (CD45.2<sup>+</sup>) derived in the BM of the primary LSK cell transplant recipients (A) and the secondary transplant recipients (B) 24-weeks posttransplant. (C and D) Absolute numbers (Upper) of CMPs, GMPs, and MEPs and the percentage (Lower) of each that are donor or E2A  $-/-$  (CD45.2<sup>+</sup>) derived in the BM of the primary LSK cell transplant recipients (C) and the secondary transplant recipients (D) 24-weeks posttransplant.

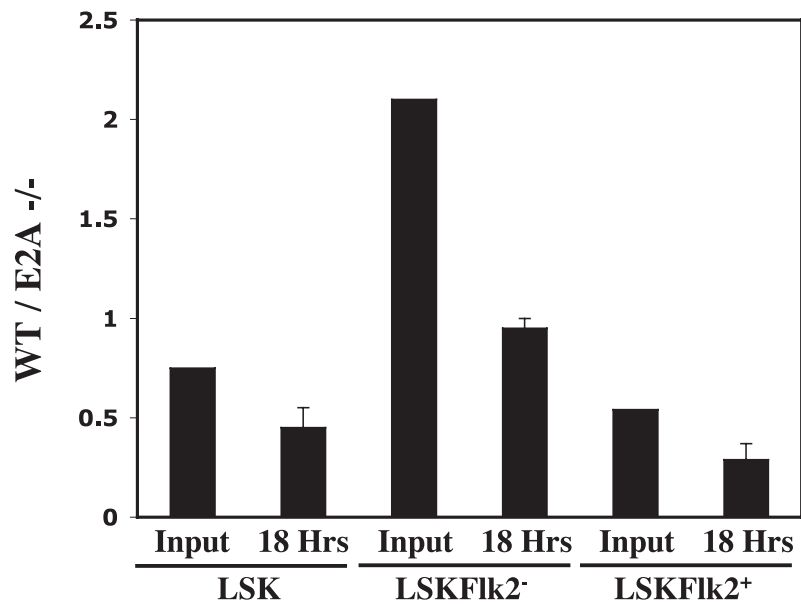

**Fig. S8.** Normal homing capacity of E2A-deficient HSCs. Lin<sup>-</sup> BM cells from wild-type and E2A<sup>-/-</sup> mice were isolated and transplanted into lethally irradiated recipient mice as described; 18 h posttransplantation, bone marrow was harvested from the recipient mice ( $n = 6$ ) as described and analyzed for the presence of CD45.2<sup>+</sup>LSK, CD45.2<sup>+</sup>LSKFlk2<sup>-</sup>, and CD45.2<sup>+</sup>LSKFlk2<sup>+</sup> cells by flow cytometry. To assess the level of homing to the bone marrow by each HSC subset, the ratio of wild-type to E2A<sup>-/-</sup> (wild-type/E2A<sup>-/-</sup>) was determined for each HSC subset within the Lin<sup>-</sup> preparations injected and compared with the wild-type to E2A<sup>-/-</sup> ratio determined 18 h posttransplant ( $n = 5$  recipients per genotype).

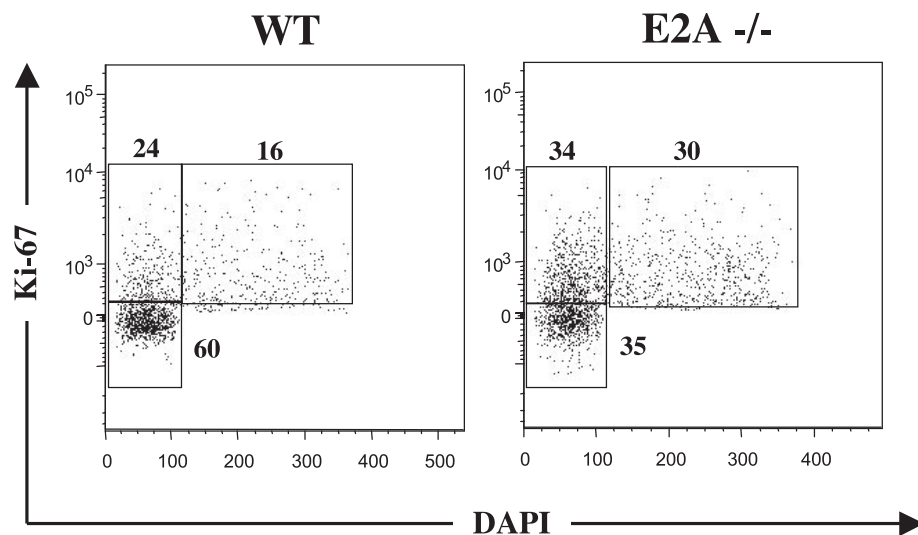

**Fig. S9.** Representative FACS profile of cell cycle analysis by staining of LSKFlk2<sup>-</sup> HSCs with Ki-67 and DAPI. Cell cycle distribution was analyzed by Ki-67 and DAPI staining of LSKFlk2<sup>-</sup> and LSKFlk2<sup>+</sup> HSC subsets of wild-type and E2A <sup>-/-</sup> mice. Shown is a representative FACS profile of the LSKFlk2<sup>-</sup> HSC subset.
